# Supplementary material for: nELISA: A high-throughput, high-plex platform enables quantitative profiling of the inflammatory secretome
Source: bioRxiv or medRxiv preprint supplement (doi:10.1101/2023.04.17.535914), 2025-03-24
Supplement: Supplementary file [file media-1.pdf]

**Suppl. Fig. 1: nELISA controls.**

(top) nELISA profiling includes internal controls consisting of beads with modified architectures capturing different aspects of the detection and serving as controls in each well to maintain signal consistency across wells and plates. Displacement controls consist of CLAMPs where capture and detection antibodies are specific to a non-human antigen that should not be present in any sample, and are used for quality control. Signal normalization controls consist of beads with no detection antibody, directly binding to the displacer oligo. (bottom) nELISA also includes external controls that are run on a separate calibration plate; as a result, no space need be reserved on sample plates for these controls. Controls include calibration curves and biological reference samples used for quality control.

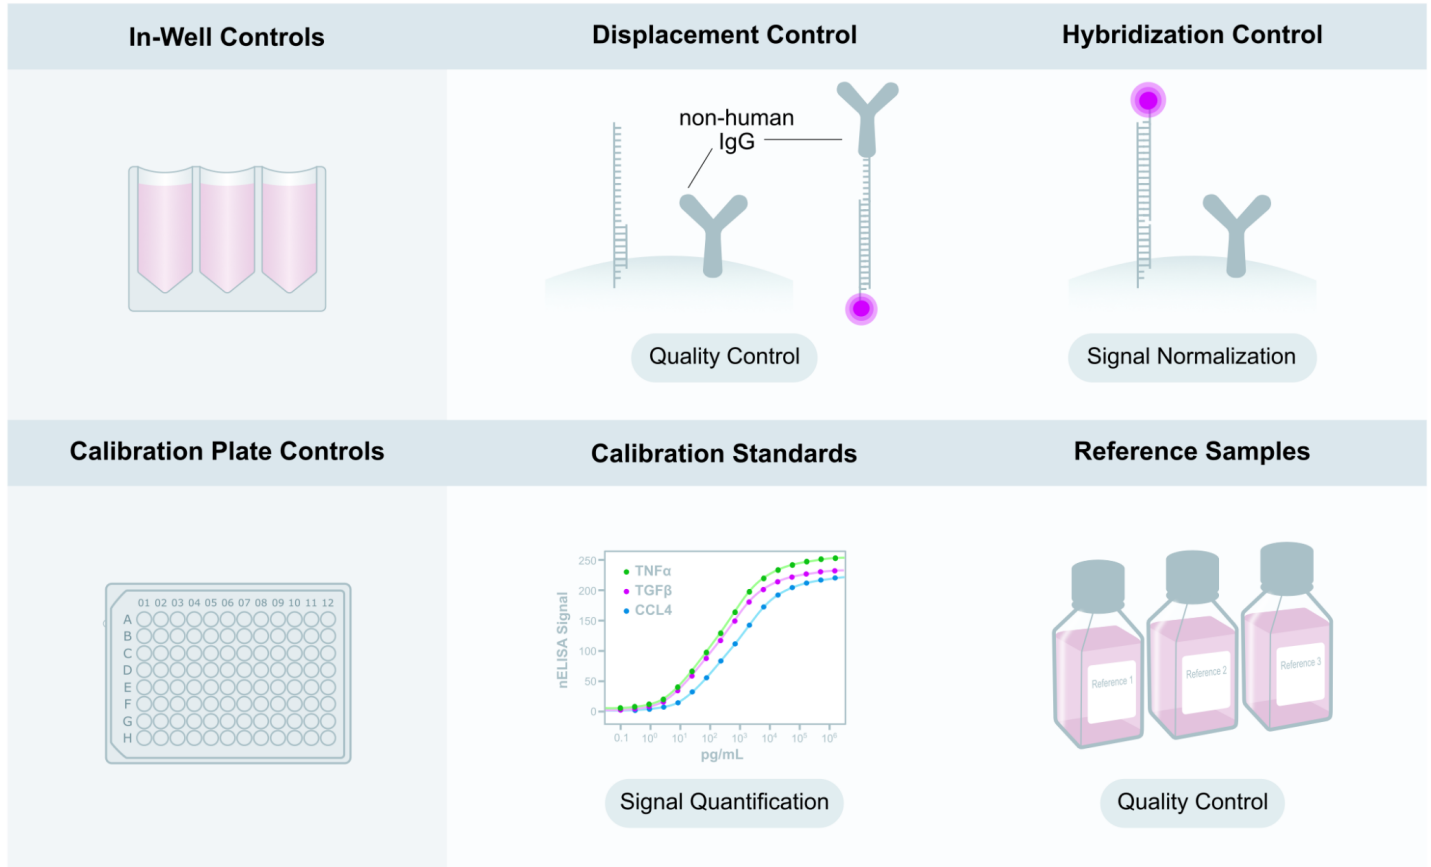

**Suppl. Fig. 2: Example calibration curves.**

Calibration curves are produced for each analyte in the nELISA panel for every profiling run. Overlapping curves over 3 days of profiling are shown for a subset of indicated CLAMPs.

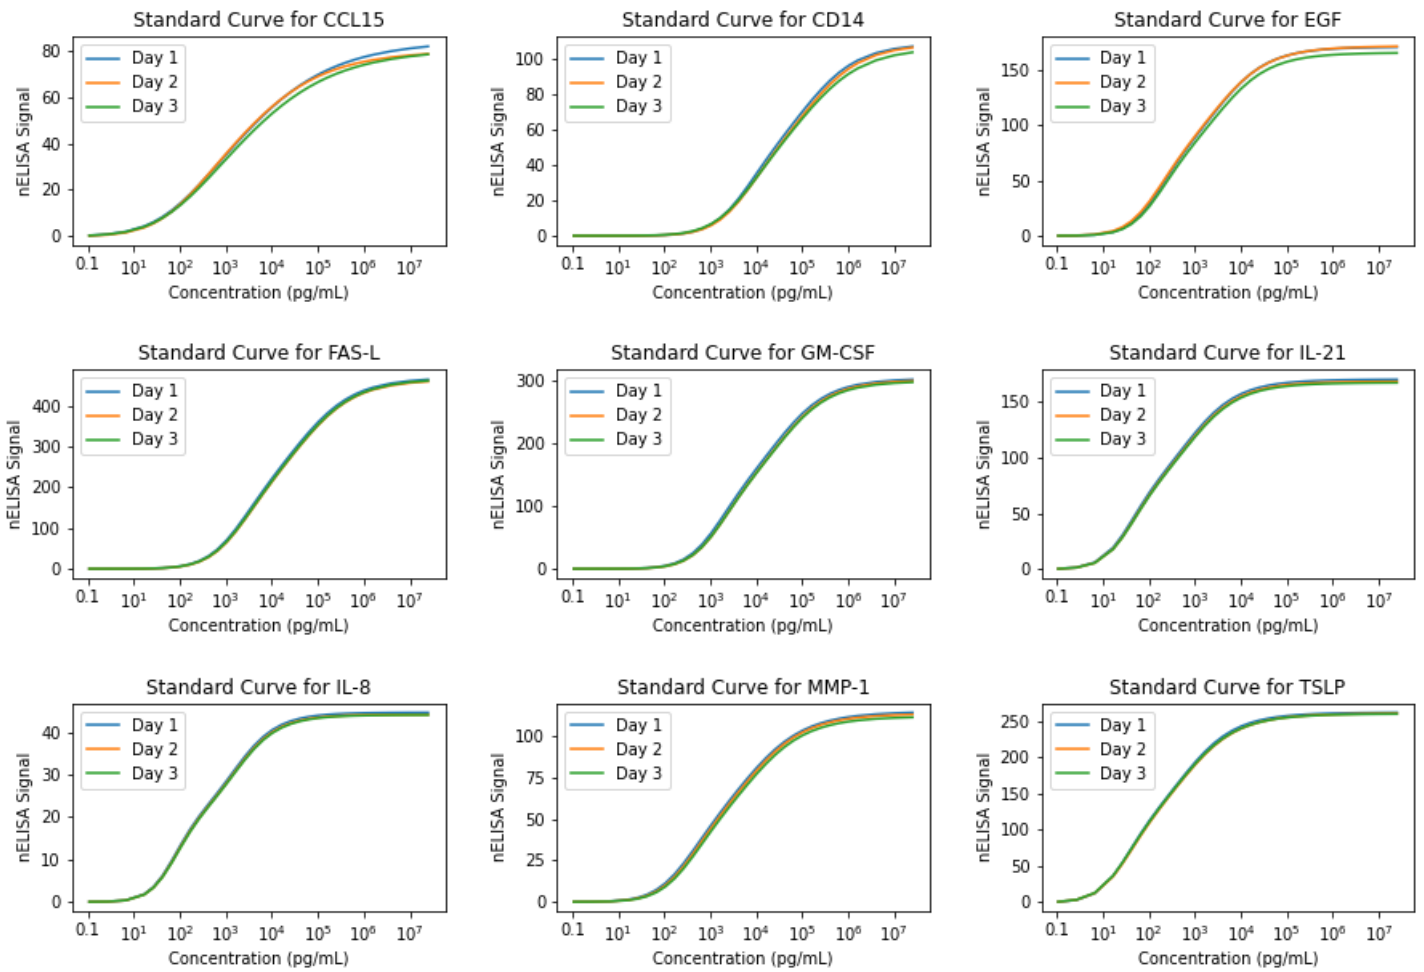

**Suppl. Fig. 3: Measurement consistency over time and manufacturing lots.**

Four lots of nELISA beads were used to repeatedly profile a reference sample included in every nELISA run. Shown are measured protein concentrations for a subset of indicated analytes over 24 different days of profiling; shaded area represents +/- 20% from average measurement, indicating minimal variation between lots and exquisite consistency over time.

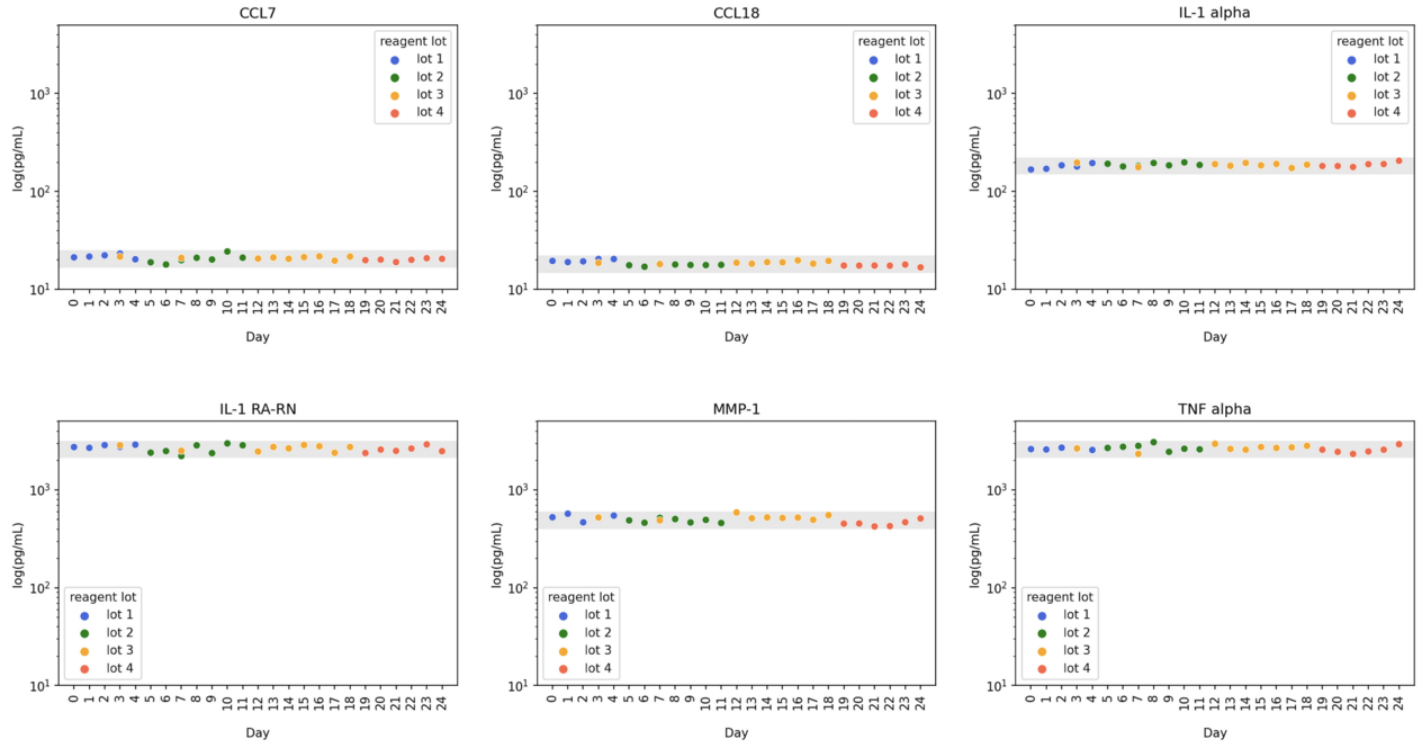

**Suppl. Fig. 4: Correlation between nELISA and xMAP.**

Cytokine levels in cell culture supernatants from stimulated PBMCs profiled with the nELISA 191-plex and a 48-plex panel based on the xMAP platform. Shown are the detected protein levels for a subset of sensors shared by both platforms and yielding detectable protein concentrations, with associated Spearman correlations.

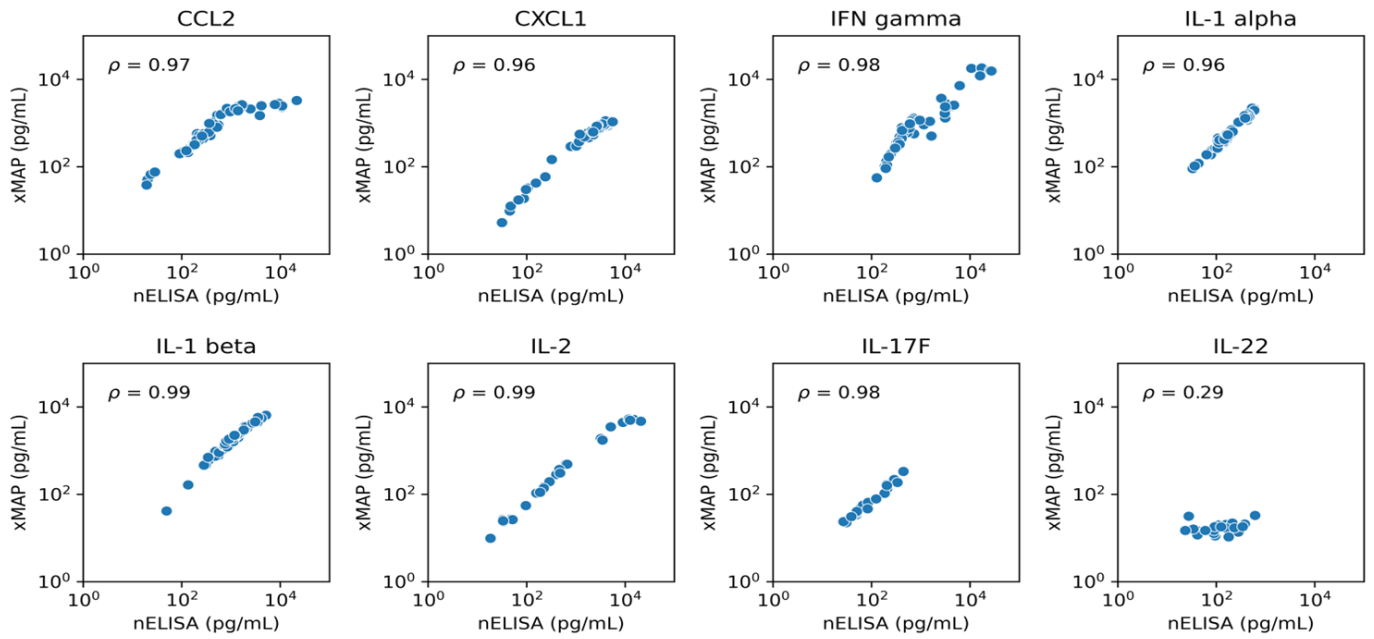





**Suppl. Fig. 7: A549 phenotypic screening.**

(top) Heatmap dendrogram of significant changes in cytokine expression levels in response to treatment with indicated compounds.

(bottom) UMAP clustering of compounds with shared effects on A549 secretomes; CHK inhibitors and the downstream Aurora B/C kinase inhibitor GSK1070916 are identified in red; pan-Aurora kinase inhibitors danusertib and AMG900 are colored blue.

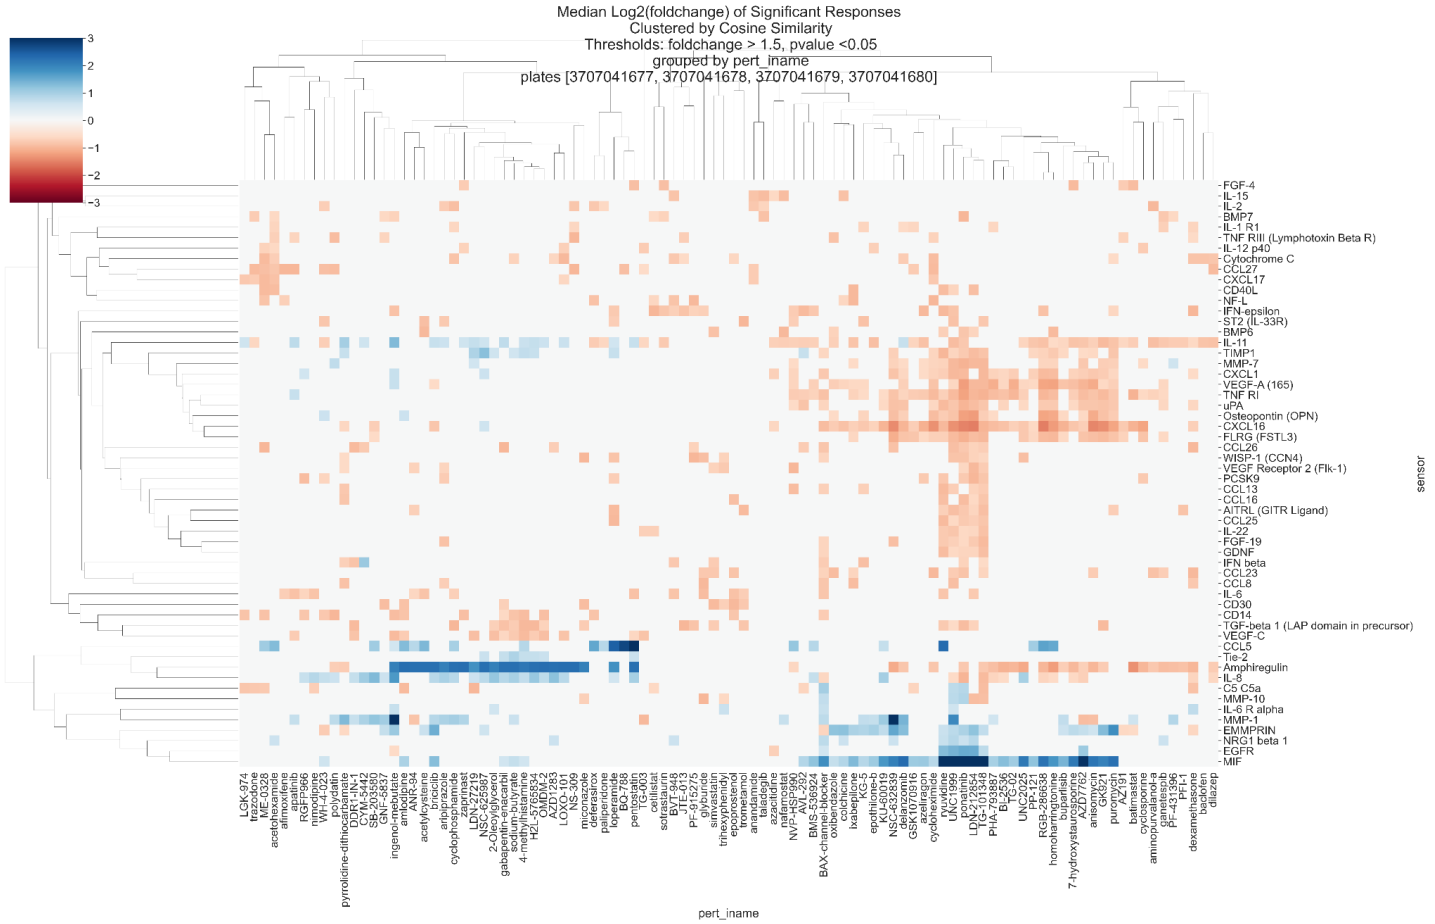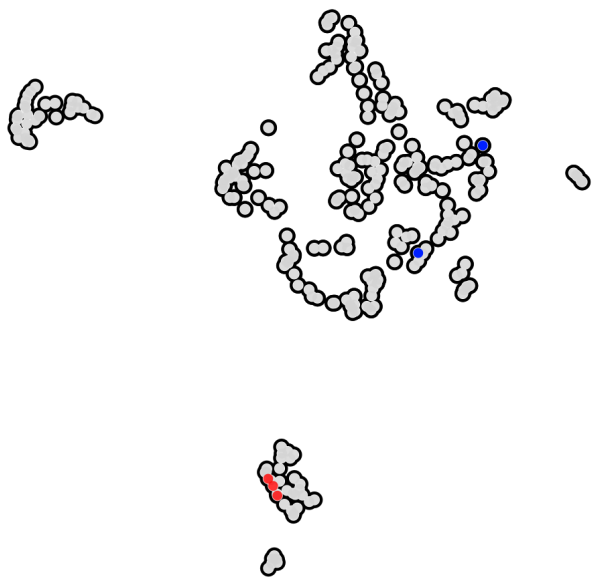

**Suppl. Fig. 8: Heatmap dendrograms of cytokine interactions in each stimulus condition.**

PBMCs were treated with indicated stimuli (ConA, Control, LPS, PMA/i or PolyIC; a separate heatmap is shown for each), and a library of 80 recombinant cytokines; shown are the significant fold changes in expression of each sensor in response to each recombinant cytokine.

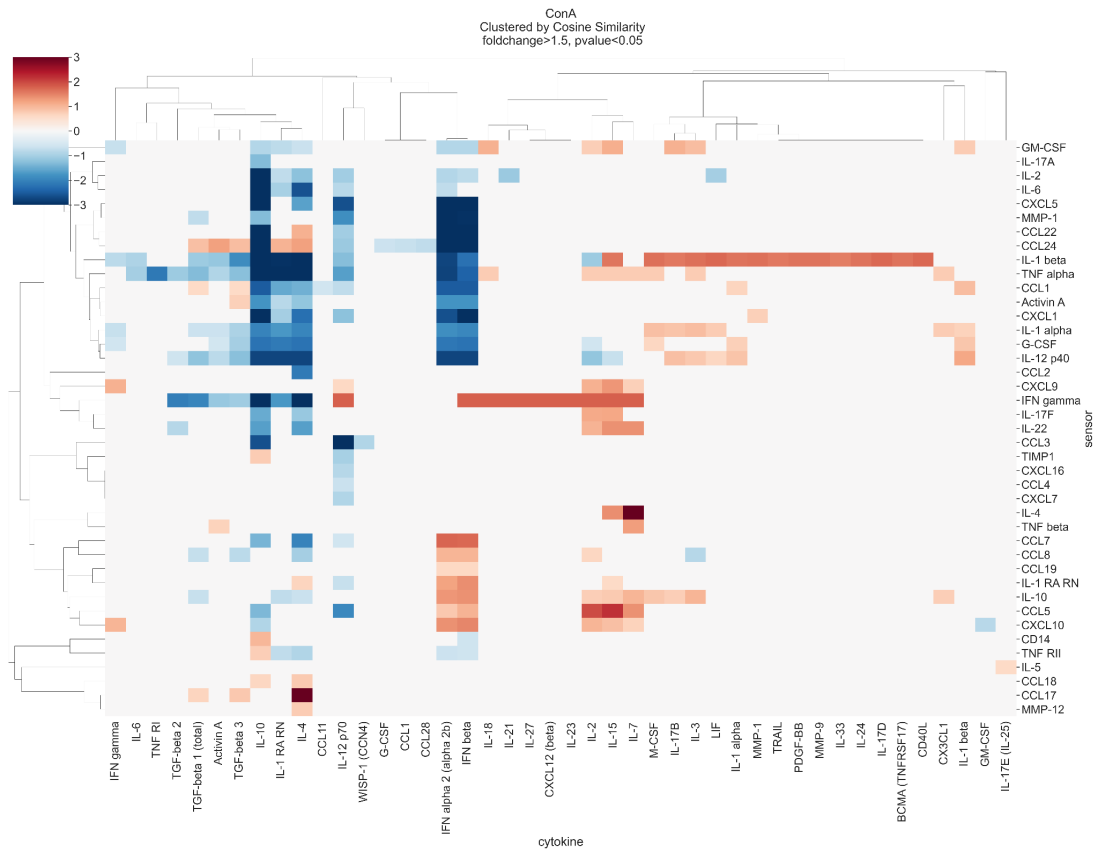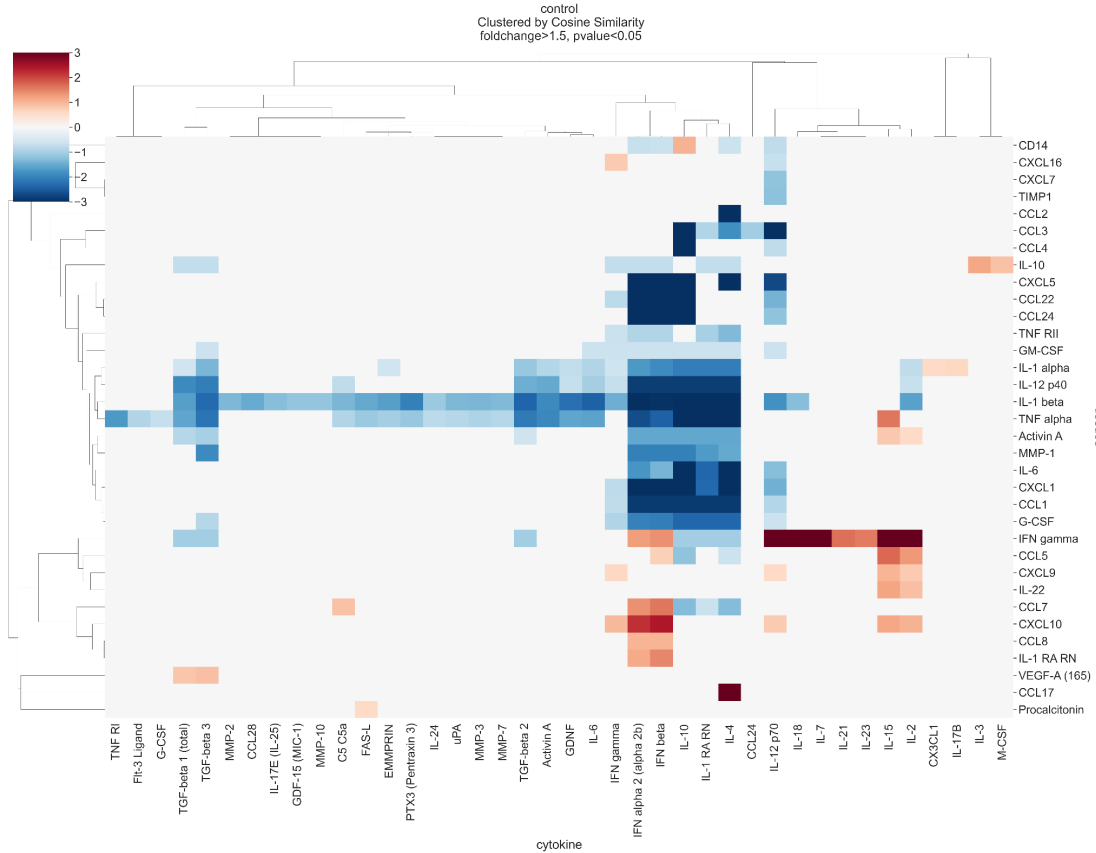



PolyIC  
 Clustered by Cosine Similarity  
 foldchange>1.5, pvalue<0.05

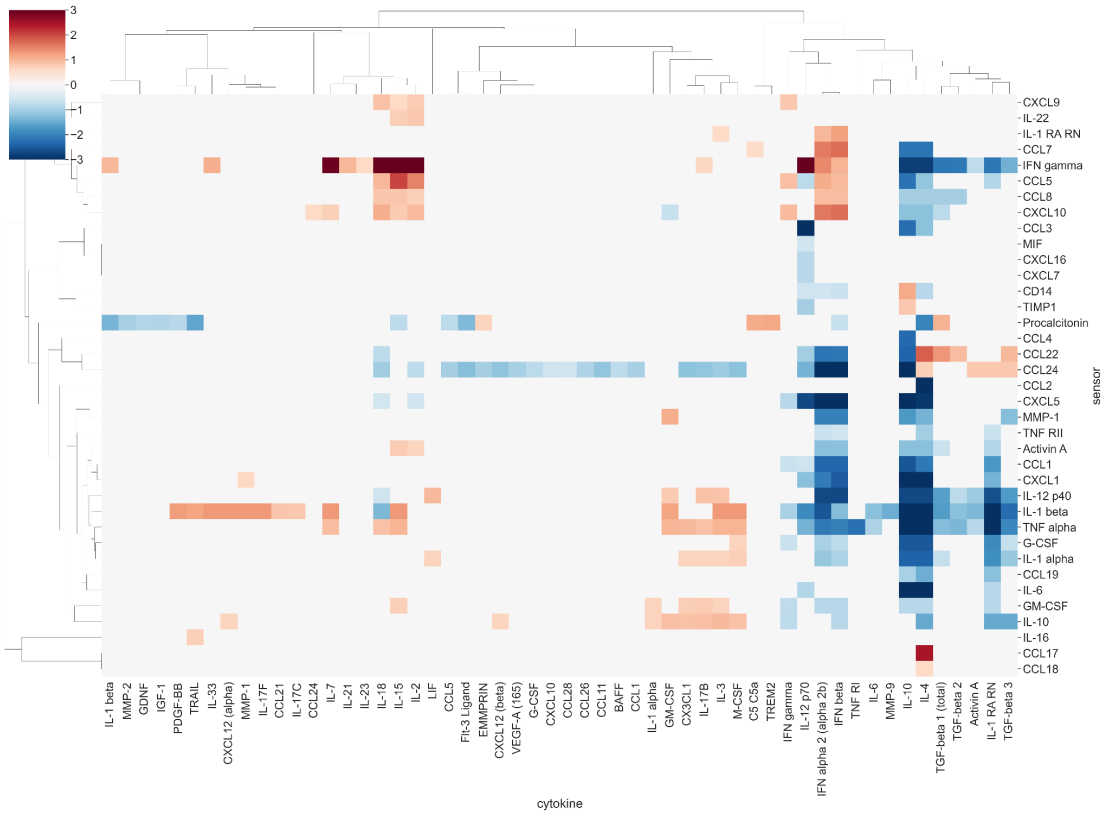





| Uniprot | Protein             | Gene Name                  | LLOD (pg/mL) | ULOD (pg/mL) |
|---------|---------------------|----------------------------|--------------|--------------|
| P08476  | Activin A           | INHBA                      | 158.4        | 1253384.8    |
| Q9UNG2  | AITRL (GITR Ligand) | TNFSF18 AITRL GITRL 1      | 732.3        | 2029446.9    |
| P37840  | alpha-Synuclein     | SNCA NACP PARK1            |              |              |
| P15514  | Amphiregulin        | AREG AREGB SDGF            | 10.3         | 72254.3      |
| P05067  | Amyloid beta        | APP A4 AD1                 | 759.3        | 4911570.1    |
| O75888  | APRIL               | TNFSF13 APRIL TALL2 2      | 96.8         | 12420.4      |
| Q9Y275  | BAFF                | TNFSF13B BAFF BLYS T       | 2573.7       | 4670425.1    |
| Q02223  | BCMA (TNFRSF17)     | TNFRSF17 BCM BCMA          | 25.2         | 1476157.7    |
| P23560  | BDNF                | BDNF                       | 11.8         | 495166.4     |
| P12643  | BMP2                | BMP2 BMP2A                 | 25.7         | 158463.9     |
| P12645  | BMP3                | BMP3 BMP3A                 | 6518.1       | 3965366.5    |
| P12644  | BMP4                | BMP4 BMP2B DVR4            | 43.0         | 214213.0     |
| P22004  | BMP6                | BMP6 VGR                   | 22330.3      | 2962253.1    |
| P18075  | BMP7                | BMP7 OP1                   | 656.4        | 4297353.1    |
| Q9UK05  | BMP9                | GDF2 BMP9                  | 5.0          | 598944.4     |
| P01031  | C5/C5a              | C5 CPAMD4                  | 1.5          | 274415.8     |
| P05937  | Calbindin           | CALB1 CAB27                | 156.4        | 4144773.8    |
| P22362  | CCL1                | CCL1 SCYA1                 | 3.5          | 22824.2      |
| P51671  | CCL11               | CCL11 SCYA11               | 2.6          | 17770.4      |
| Q99616  | CCL13               | CCL13 MCP4 NCC1 SCY        | 1.6          | 5488.9       |
| Q16627  | CCL14               | CCL14 NCC2 SCYA14          | 2.0          | 56057.4      |
| Q16663  | CCL15               | CCL15 MIP5 NCC3 SCY        | 0.6          | 1612307.4    |
| O15467  | CCL16               | CCL16 ILINCK NCC4 SC       | 15.7         | 41417.5      |
| Q92583  | CCL17               | CCL17 SCYA17 TARC          | 1.9          | 37813.1      |
| P55774  | CCL18               | CCL18 AMAC1 DCCK1 I        | 1.6          | 32184.7      |
| Q99731  | CCL19               | CCL19 ELC MIP3B SCYA       | 6.2          | 73761.0      |
| P13500  | CCL2                | CCL2 MCP1 SCYA2            | 1.8          | 8802.9       |
| P78556  | CCL20               | CCL20 LARC MIP3A SC        | 19.8         | 30574.1      |
| O00585  | CCL21               | CCL21 SCYA21 UNQ78.        | 44.0         | 1755993.1    |
| O00626  | CCL22               | CCL22 MDC SCYA22 A-        | 7.6          | 164807.7     |
| P55773  | CCL23               | CCL23 MIP3 MPIF1 SCY       | 96.9         | 77953.0      |
| O00175  | CCL24               | CCL24 MPIF2 SCYA24         | 7.6          | 31862.6      |
| O15444  | CCL25               | CCL25 SCYA25 TECK          | 38.1         | 676134.3     |
| Q9Y258  | CCL26               | CCL26 SCYA26 UNQ216/PRO242 |              |              |
| Q9Y4X3  | CCL27               | CCL27 ILC SCYA27           | 111.5        | 1175188.3    |
| Q9NRJ3  | CCL28               | CCL28 SCYA28               | 7.7          | 59253.1      |
| P10147  | CCL3                | CCL3 GOS19-1 MIP1A S       | 1.3          | 25392.6      |
| P13236  | CCL4                | CCL4 LAG1 MIP1B SCY        | 5.9          | 68324.8      |
| P13501  | CCL5                | CCL5 D17S136E SCYA5        | 1.8          | 5201.0       |
| P80098  | CCL7                | CCL7 MCP3 SCYA6 SCY        | 3.9          | 5536.3       |
| P80075  | CCL8                | CCL8 MCP2 SCYA10 SC        | 45.0         | 50256.8      |
| P08571  | CD14                | CD14                       | 69.7         | 1847643.7    |

|        |                 |                      |        |           |
|--------|-----------------|----------------------|--------|-----------|
| Q86VB7 | CD163           | CD163 M130           | 3925.3 | 5024700.5 |
| Q5ZPR3 | CD276 (B7-H3)   | CD276 B7H3 PSEC0249  | 789.5  | 1233225.3 |
| P32970 | CD27L           | CD70 CD27L CD27LG T  | 2453.5 | 4919848.7 |
| P28908 | CD30            | TNFRSF8 CD30 D1S166  | 1618.5 | 1654368.3 |
| P29965 | CD40L           | CD40LG CD40L TNFSF5  | 17.4   | 351069.5  |
| P26441 | CNTF            | CNTF                 | 59.3   | 4274439.2 |
| P02741 | CRP             | CRP PTX1             | 50.1   | 715617.6  |
| P78423 | CX3CL1          | CX3CL1 FKN NTT SCYD  | 254.0  | 2963968.0 |
| P09341 | CXCL1           | CXCL1 GRO GRO1 GRO   | 11.4   | 268519.6  |
| P02778 | CXCL10          | CXCL10 INP10 SCYB10  | 26.6   | 56012.0   |
| O14625 | CXCL11          | CXCL11 ITAC SCYB11 S | 17.7   | 27214.7   |
| P48061 | CXCL12 (alpha)  | CXCL12 SDF1 SDF1A S  | 17.2   | 48264.8   |
| P48061 | CXCL12 (beta)   | CXCL12 SDF1 SDF1A S  | 13.5   | 1003520.2 |
| O43927 | CXCL13          | CXCL13 BCA1 BLC SCYE | 6.0    | 119996.2  |
| O95715 | CXCL14          | CXCL14 MIP2G NJAC S  | 18.8   | 214476.1  |
| Q9H2A7 | CXCL16          | CXCL16 SCYB16 SRPSO  | 6.5    | 450627.7  |
| Q6UXB2 | CXCL17          | CXCL17 VCC1 UNQ473   | 18.4   | 212399.3  |
| P19876 | CXCL3           | CXCL3 GRO3 GROG SC   | 5.7    | 5252.1    |
| P02776 | CXCL4           | PF4 CXCL4 SCYB4      | 95.4   | 511256.5  |
| P42830 | CXCL5           | CXCL5 ENA78 SCYB5    | 8.0    | 85960.0   |
| P80162 | CXCL6           | CXCL6 GCP2 SCYB6     | 20.4   | 35260.1   |
| P02775 | CXCL7           | PPBP CTAP3 CXCL7 SC  | 9.3    | 58955.3   |
| Q07325 | CXCL9           | CXCL9 CMK MIG SCYB9  | 9.0    | 230711.0  |
| P99999 | Cytochrome C    | CYCS CYC             | 974.1  | 286430.0  |
| P01133 | EGF             | EGF                  | 2.9    | 136661.0  |
| P00533 | EGFR            | EGFR ERBB ERBB1 HER  | 39.5   | 2396952.0 |
| P35613 | EMMPRIN         | BSG UNQ6505/PRO213   | 161.6  | 3145017.8 |
| P48023 | FAS-L           | FASLG APT1LG1 CD95L  | 15.9   | 2197357.9 |
| P05230 | FGF-1           | FGF1 FGFA            | 160.5  | 3102350.6 |
| O95750 | FGF-19          | FGF19 UNQ334/PRO53   | 30.5   | 599004.7  |
| P09038 | FGF-2           | FGF2 FGFB            | 27.1   | 88051.2   |
| Q9NSA1 | FGF-21          | FGF21 UNQ3115/PRO1   | 114.2  | 4104819.7 |
| P08620 | FGF-4           | FGF4 HST HSTF1 KS3   | 24.5   | 117570.3  |
| P10767 | FGF-6           | FGF6 HST2 HSTF2      | 33.5   | 128444.5  |
| P21781 | FGF-7 (KGF)     | FGF7 KGF             | 4.3    | 63753.8   |
| P31371 | FGF-9           | FGF9                 | 53.6   | 570678.6  |
| P22607 | FGFR3 (IIIc)    | FGFR3 JTK4           | 406.3  | 1959101.2 |
| O95633 | FLRG (FSTL3)    | FSTL3 FLRG UNQ674/P  | 18.8   | 388920.7  |
| P49771 | Flt-3 Ligand    | FLT3LG               | 13.1   | 356591.7  |
| P09919 | G-CSF           | CSF3 C17orf33 GCSF   | 16.1   | 131746.1  |
| O95390 | GDF-11 (BMP-11) | GDF11 BMP11          | 273.8  | 4613427.1 |
| Q99988 | GDF-15 (MIC-1)  | GDF15 MIC1 PDF PLAB  | 7.9    | 126651.5  |
| P39905 | GDNF            | GDNF                 | 6.7    | 80204.4   |

|             |                            |                        |        |           |
|-------------|----------------------------|------------------------|--------|-----------|
| P04141      | GM-CSF                     | CSF2 GMCSF             | 41.6   | 841289.1  |
| P10144      | Granzyme B                 | GZMB CGL1 CSPB CTLA    | 4586.1 | 3361279.4 |
| P01241      | Growth Hormone (Somat GH1  |                        | 38.6   | 1465366.7 |
| P14210      | HGF                        | HGF HPTA               | 72.9   | 886255.6  |
| Q92956      | HVEM                       | TNFRSF14 HVEA HVEM     | 45.1   | 1530655.0 |
| P05362      | ICAM-1                     | ICAM1                  | 82.8   | 1643119.7 |
| P13598      | ICAM-2                     | ICAM2                  | 1315.5 | 4604524.4 |
| P01563      | IFN alpha 2 (alpha 2b)     | IFNA2 IFNA2A IFNA2B    | 23.1   | 1015243.6 |
| P01574      | IFN beta                   | IFNB1 IFB IFNB         | 17.7   | 345232.9  |
| P01579      | IFN gamma                  | IFNG                   | 38.9   | 188337.4  |
| Q86WN2      | IFN-epsilon                | IFNE IFNE1 UNQ360/P    | 1664.4 | 4070576.5 |
| P05019      | IGF-1                      | IGF1 IBP1              | 2243.5 | 4673624.6 |
| P01583      | IL-1 alpha                 | IL1A IL1F1             | 9.5    | 276639.2  |
| P01584      | IL-1 beta                  | IL1B IL1F2             | 10.2   | 87709.4   |
| P14778      | IL-1 R1                    | IL1R1 IL1R IL1RA IL1RT | 120.0  | 1260165.3 |
| P18510      | IL-1 RA/RN                 | IL1RN IL1F3 IL1RA      | 53.2   | 2100195.8 |
| P22301      | IL-10                      | IL10                   | 11.1   | 622881.2  |
| P20809      | IL-11                      | IL11                   | 13.2   | 3881517.2 |
| P29459      | IL-12 p35                  | IL12A NKSF1            | 38.5   | 1159448.1 |
| P29460      | IL-12 p40                  | IL12B NKSF2            | 17.8   | 878191.8  |
| P29459      | IL-12 p70                  | IL12A NKSF1            | 16.3   | 235395.5  |
| P40933      | IL-15                      | IL15                   | 18.9   | 670824.0  |
| P40933 & Q1 | IL-15/IL-15R alpha complex | IL15 & IL15RA          | 55.4   | 1459300.1 |
| Q14005      | IL-16                      | IL16                   | 8.3    | 3745650.3 |
| Q16552      | IL-17A                     | IL17A CTLA8 IL17       | 41.1   | 1083101.1 |
| Q9UHF5      | IL-17B                     | IL17B IL20 NIRF ZCYTO  | 59.5   | 47819.3   |
| Q9P0M4      | IL-17C                     | IL17C UNQ561/PRO11     | 305.5  | 1421069.6 |
| Q8TAD2      | IL-17D                     | IL17D UNQ3096/PRO2     | 95.0   | 68341.1   |
| Q9H293      | IL-17E (IL-25)             | IL25 IL17E UNQ3120/P   | 19.2   | 5119455.5 |
| Q96PD4      | IL-17F                     | IL17F                  | 4.7    | 3782439.3 |
| Q14116      | IL-18                      | IL18 IGIF IL1F4        | 36.6   | 554601.0  |
| P60568      | IL-2                       | IL2                    | 6.0    | 382201.0  |
| P01589      | IL-2 RA                    | IL2RA                  | 56.9   | 2325155.1 |
| Q9HBE4      | IL-21                      | IL21                   | 1.0    | 39066.2   |
| Q9GZX6      | IL-22                      | IL22 ILTIF ZCYTO18 UN  | 10.7   | 371635.4  |
| Q969J5      | IL-22 BP                   | IL22RA2 UNQ5793/PR     | 3717.0 | 4788254.9 |
| Q9NPF7      | IL-23                      | IL23A SGRF UNQ2498/    | 60.4   | 2079795.2 |
| Q13007      | IL-24                      | IL24 MDA7 ST16         | 48.3   | 3050192.7 |
| Q8NEV9      | IL-27                      | IL27 IL27A IL30        | 14.2   | 524163.9  |
| Q8IZJ0      | IL-28A                     | IFNL2 IL28A ZCYTO20    | 5.7    | 2000050.4 |
| Q8IU54      | IL-29                      | IFNL1 IL29 ZCYTO21     | 20.1   | 3678013.5 |
| P08700      | IL-3                       | IL3                    | 524.9  | 48721.3   |
| Q6EBC2      | IL-31                      | IL31                   | 26.9   | 3805176.0 |

|        |                          |                        |         |           |
|--------|--------------------------|------------------------|---------|-----------|
| P24001 | IL-32 (alpha)            | IL32 NK4 TAIF          | 232.2   | 2919949.8 |
| O95760 | IL-33                    | IL33 C9orf26 IL1F11 NF | 21.1    | 1402724.1 |
| Q14213 | IL-35                    | EBI3 IL27B             | 587.0   | 4471381.4 |
| P05112 | IL-4                     | IL4                    | 2.8     | 191393.0  |
| P05113 | IL-5                     | IL5                    | 3.9     | 496838.6  |
| P05231 | IL-6                     | IL6 IFNB2              | 8.3     | 877447.8  |
| P08887 | IL-6 R alpha             | IL6R                   | 11.4    | 647680.0  |
| P13232 | IL-7                     | IL7                    | 4.3     | 9810.2    |
| P10145 | IL-8                     | CXCL8 IL8              | 3.5     | 11643.4   |
| P15248 | IL-9                     | IL9                    | 3735.5  | 4891685.7 |
| P41159 | Leptin                   | LEP OB OBS             | 49.4    | 3361527.9 |
| P15018 | LIF                      | LIF HILDA              | 7.9     | 418219.0  |
| P78380 | LOX1 (OLR1)              | OLR1 CLEC8A LOX1       | 20.5    | 1781872.9 |
| P09603 | M-CSF                    | CSF1                   | 166.9   | 821814.6  |
| P07333 | M-CSF R (CD115)          | CSF1R FMS              | 536.3   | 596833.1  |
| Q13421 | Mesothelin               | MSLN MPF               | 301.4   | 4952685.7 |
| P14174 | MIF                      | MIF GLIF MMIF          | 22.1    | 4445989.7 |
| P03956 | MMP-1                    | MMP1 CLG               | 3.3     | 536936.4  |
| P09238 | MMP-10                   | MMP10 STMY2            | 329.1   | 2188296.2 |
| P39900 | MMP-12                   | MMP12 HME              | 32.0    | 334447.4  |
| P08253 | MMP-2                    | MMP2 CLG4A             | 3420.1  | 3879473.7 |
| P08254 | MMP-3                    | MMP3 STMY1             | 21.2    | 2659660.7 |
| P09237 | MMP-7                    | MMP7 MPSL1 PUMP1       | 32.8    | 831478.1  |
| P14780 | MMP-9                    | MMP9 CLG4B             | 1131.1  | 3386978.6 |
| P07196 | NF-L                     | NEFL NF68 NFL          | 27998.5 | 192174.3  |
| P01138 | NGF beta                 | NGF NGFB               | 3.7     | 113544.0  |
| Q02297 | NRG1 beta 1              | NRG1 GGF HGL HRGA      | 164.6   | 511762.7  |
| P13725 | Oncostatin M (OSM)       | OSM                    | 10.9    | 175054.2  |
| P10451 | Osteopontin (OPN)        | SPP1 BNSP OPN PSEC0    | 143.4   | 3131871.1 |
| Q8NBP7 | PCSK9                    | PCSK9 NARC1 PSEC005    | 507.5   | 3398229.3 |
| P01127 | PDGF-BB                  | PDGFB PDGF2 SIS        | 1220.5  | 399584.0  |
| P49763 | PLGF                     | PGF PGFL PLGF          | 31.9    | 277595.4  |
| P26022 | PTX3 (Pentraxin 3)       | PTX3 TNFAIP5 TSG14     | 143.1   | 2375867.0 |
| Q9HD89 | Resistin                 | RETN FIZZ3 HXCP1 RST   | 142.6   | 2160416.8 |
| PODJI8 | SAA                      | SAA1                   | 2640.8  | 4367304.3 |
| P21583 | SCF                      | KITLG MGF SCF          | 21.7    | 4028932.8 |
| Q01638 | ST2 (IL-33R)             | IL1RL1 DER4 ST2 T1     | 100.1   | 132439.6  |
| P01137 | TGF-beta 1 (LAP domain i | TGFB1 TGFB             | 34.6    | 1833062.7 |
| P01137 | TGF-beta 1 (total)       | TGFB1 TGFB             | 18.5    | 63287.3   |
| P61812 | TGF-beta 2               | TGFB2                  | 64.9    | 121809.2  |
| P10600 | TGF-beta 3               | TGFB3                  | 49.3    | 860397.4  |
| Q02763 | Tie-2                    | TEK TIE2 VMCM VMCM     | 403.5   | 3099346.9 |
| P01033 | TIMP1                    | TIMP1 CLGI TIMP        | 13.0    | 320543.3  |

|        |                          |                     |        |           |
|--------|--------------------------|---------------------|--------|-----------|
| P13726 | Tissue Factor (TF)       | F3                  | 11.1   | 2145895.1 |
| P01375 | TNF alpha                | TNF TNFA TNFSF2     | 30.7   | 1948014.7 |
| P01374 | TNF beta                 | LTA TNFB TNFSF1     | 197.4  | 14280.5   |
| P19438 | TNF RI                   | TNFRSF1A TNFAR TNFF | 67.6   | 1593844.0 |
| P20333 | TNF RII                  | TNFRSF1B TNFBR TNFF | 18.1   | 628088.5  |
| P36941 | TNF RIII (Lymphotoxin Be | LTBR D12S370 TNFCR  | 140.5  | 3411941.5 |
| P40225 | TPO (Thrombopoietin)     | THPO MGDF           | 364.7  | 1209706.7 |
| P50591 | TRAIL                    | TNFSF10 APO2L TRAIL | 896.0  | 2248416.3 |
| Q9NZC2 | TREM2                    | TREM2               | 2463.4 | 5426102.1 |
| Q969D9 | TSLP                     | TSLP                | 0.7    | 45525.2   |
| O43508 | TWEAK                    | TNFSF12 APO3L DR3LC | 39.2   | 96416.3   |
| P00749 | uPA                      | PLAU                | 183.4  | 4800650.7 |
| P19320 | VCAM-1                   | VCAM1               | 627.0  | 3045738.2 |
| P35968 | VEGF Receptor 2 (Flk-1)  | KDR FLK1 VEGFR2     | 474.8  | 3748541.5 |
| P15692 | VEGF-A (165)             | VEGFA VEGF          | 12.4   | 85831.4   |
| P49767 | VEGF-C                   | VEGFC               | 1496.3 | 3921745.2 |
| O43915 | VEGF-D                   | VEGFD FIGF          | 35.3   | 1785955.1 |
| P17948 | VEGFR-1                  | FLT1 FLT FRT VEGFR1 | 111.2  | 3076963.4 |
| O95388 | WISP-1 (CCN4)            | CCN4 WISP1          | 33.4   | 801513.2  |
| P47992 | XCL1 (Lymphotactin)      | XCL1 LTN SCYC1      | 37.6   | 584462.3  |
